# Supplementary material for: Significant Improvement of Cloud Representation in Global Climate Model MRI-ESM2
Source: Copernicus journal article supplement (doi:10.5194/gmd-2019-23), 2019-03-28
Supplement: Supplementary file 1 [file gmd-2019-23-supplement.pdf]

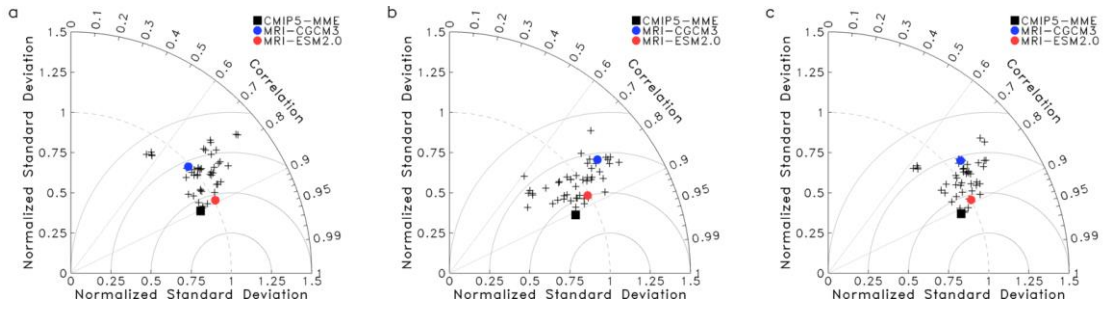

1

2

3 **Figure S1:**

4 Same as Fig. 2, but for cloud radiative effects: (a) shortwave, (b) longwave, and (c) net cloud

5 radiative effects.

6

## 7 **A. Derivation of velocities of falling cloud ice**

### 8 **A.1 Terminal velocity of cloud ice particles and mass equivalent diameter**

9 The mass equivalent diameter  $D_m$  (cm)<sup>1</sup> is defined as follows using mass  $M$  (g):

$$10 \quad M = \rho_{\text{ice}} \frac{\pi}{6} D_m^3 \quad (\text{S1})$$

11 where  $\rho_{\text{ice}}$  (g cm<sup>-3</sup>) is the density of ice and  $\rho_{\text{ice}} = 0.91$  (g cm<sup>-3</sup>) is used here.

12 On the other hand, Heymsfield and Iaquinta (2000) proposed the mass of each cloud ice  
13 particle  $M$  (g) and the terminal velocity  $V_t$  (cm s<sup>-1</sup>) as functions of the maximum length  $D_L$  (cm),  
14 with  $M(D_L)$  given by:

$$15 \quad M(D_L) = \alpha D_L^\beta \quad (\text{S2})$$

16 Values of  $\alpha$  and  $\beta$  vary depending on the crystal shape of cloud ice. Columns for  $D_m < 0.01$  (cm)  
17 and bullet rosettes for  $D_m > 0.01$  (cm) are assumed in this study in accordance with  
18 Zurovac-Jevtic and Zhang (2003). Based on the above assumptions, the values for columns  $\alpha =$   
19  $1.649 \times 10^{-3}$  and  $\beta = 2.20$  are used for  $D_m < 0.01$  (cm), and the values for bullet rosettes  $\alpha = 3.99$   
20  $\times 10^{-4} n_b$  and  $\beta = 2.27$  are used for  $D_m > 0.01$  (cm) (Zurovac-Jevtic and Zhang 2003) where  $n_b$  is  
21 the number of bullets in a rosette and  $n_b = 2$  is assumed here. Then  $V_t(D_L)$  is given by:

$$22 \quad V_t(D_L) = x D_L^y \quad (\text{S3})$$

23 Though  $x$  and  $y$  vary depending on the shapes of cloud ice, the values for columns  $x = 3086$  and  
24  $y = 1.26$  are used for  $D_m < 0.01$  (cm), and the values for bullet rosettes  $x = 492$  and  $y = 0.70$  are  
25 used for  $D_m > 0.01$  (cm) under the same assumptions as mentioned above (Zurovac-Jevtic and  
26 Zhang, 2003).

27 Eq. (S3) can be written as follows using Eq. (S1) and Eq. (S2):

---

<sup>1</sup> In Supplement A, the CGS system of units is used in the derivation in order to refer directly to the original papers. However, as an exception we use the unit kg m<sup>-3</sup> for ice water content IWC.

28 
$$V_t(D_m) = x \left( \frac{\pi \rho_{\text{ice}} D_m^3}{6\alpha} \right)^{\frac{y}{\beta}} \quad (\text{S4})$$

29 **A.2 Size-distribution function of cloud ice**

30 McFarquhar and Heymsfield (1997; hereafter MH97) derived a number distribution  
 31 function  $N(D_m)$  for particles with mass-equivalent diameter  $D_m$  based on observations of cirrus.  
 32 This subsection is a brief extract from MH97.

33  $N(D_m)$  for  $D_m < 0.01$  (cm) is as follows:

34 
$$N(D_m) = \frac{6\text{IWC}_{\text{all}} \alpha_{<100}^5 D_m}{\pi \rho_{\text{ice}} \Gamma(5)} \exp(-\alpha_{<100} D_m) \quad (\text{S5})$$

35 where  $\Gamma$  is the gamma function and  $\text{IWC}_{\text{all}}$  is ice water content ( $\text{kg m}^{-3}$ ) for the whole cloud ice.  
 36  $\alpha_{<100}$  is a parameter that determines the shape of the distribution, and it can be represented as  
 37 follows using ice water content with size smaller than 0.01cm,  $\text{IWC}_{<100}$  ( $\text{kg m}^{-3}$ ).

38 
$$\alpha_{<100} = b_\alpha - m_\alpha \log_{10} \left( \frac{\text{IWC}_{<100}}{\text{IWC}_0} \right) \quad (\text{S6})$$

39 where  $b_\alpha = -49.9 \pm 55.0$  ( $\text{cm}^{-1}$ ),  $m_\alpha = 494 \pm 29$  ( $\text{cm}^{-1}$ ) and  $\text{IWC}_0 = 1 \times 10^{-3}$  ( $\text{kg m}^{-3}$ ). These  
 40 equations mean that the peak of the distribution moves toward a larger value of  $D_m$  with  
 41 increasing ice water content with size smaller than 0.01cm,  $\text{IWC}_{<100}$

42 For  $D_m > 0.01$  (cm), the distribution is as follows:

43 
$$N(D_m) = \frac{6\text{IWC}_{\text{all}}}{\pi^{\frac{3}{2}} \rho_{\text{ice}} \sqrt{2} \exp\left(3\mu_{>100} + \frac{9}{2}\sigma_{>100}^2\right) D_m \sigma_{>100} D_0^3} \exp \left[ -\frac{1}{2} \left( \frac{\log \frac{D_m}{D_0} - \mu_{>100}}{\sigma_{>100}} \right)^2 \right] \quad (\text{S7})$$

44 where  $D_0 = 1 \times 10^{-4}$  (cm), and  $\mu_{>100}$  and  $\sigma_{>100}$  are parameters that determine the peak and the  
 45 width of the distribution, respectively. These are given as follows in terms of ice water content  
 46 with size larger than 0.01cm,  $\text{IWC}_{>100}$  ( $\text{kg m}^{-3}$ ).

47 
$$\mu_{>100} = a_\mu(T) + b_\mu(T) \log_{10} \left( \frac{\text{IWC}_{>100}}{\text{IWC}_0} \right) \quad (\text{S8})$$

48 
$$\sigma_{>100} = a_\sigma(T) + b_\sigma(T) \log_{10} \left( \frac{\text{IWC}_{>100}}{\text{IWC}_0} \right) \quad (\text{S9})$$

49 where  $a_\mu(T)$ ,  $b_\mu(T)$  and  $a_\sigma(T)$ ,  $b_\sigma(T)$  are constants that depend on temperature. In this study,  $a_\mu =$   
 50 5.148,  $b_\mu = 0.089$ ,  $a_\sigma = 0.396$  and  $b_\sigma = 0.044$  are adopted (values for  $-50^\circ\text{C} < T < -40^\circ\text{C}$  were  
 51 chosen as representative values for cirrus ice). These equations mean that the peak of the  
 52 distribution moves toward a larger value of  $D_m$  and the width of the distribution expands as ice  
 53 water content whose size is larger than  $0.01\mu\text{m}$ ,  $\text{IWC}_{>100}$ , becomes greater.

54 On the other hand,  $\text{IWC}_{<100}$  can be calculated as follows:

$$55 \quad \text{IWC}_{<100} = \min \left[ \text{IWC}_T, a \left( \frac{\text{IWC}_T}{\text{IWC}_0} \right)^b \right] \quad (\text{S10})$$

56 where  $a$  and  $b$  are constants taken as  $2.52 \times 10^{-4}$  ( $\text{kg m}^{-3}$ ) and 0.837, respectively, and  $\text{IWC}_T$  is  
 57 ice water content ( $\text{kg m}^{-3}$ ) for the whole cloud ice.  $\text{IWC}_{>100}$  can be calculated from the relation  
 58  $\text{IWC}_T = \text{IWC}_{<100} + \text{IWC}_{>100}$ . The term  $\alpha_i$  in the text refers to the ratio  $\text{IWC}_{<100} / \text{IWC}_T$ ; this  $\alpha_i$  is  
 59 shown in Fig. S2 in this supplement.

60

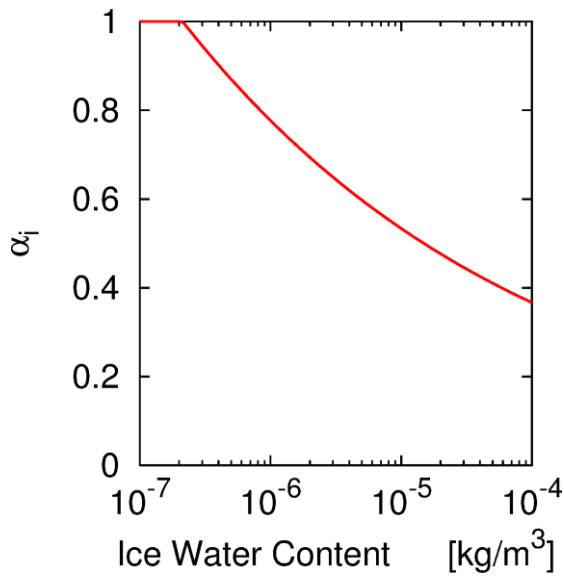

**Figure S2:**

Ratio of particles smaller than  $100 \mu\text{m}$  to total ice water content,  $\alpha_i$  (MH97). The abscissa shows total ice water content  $\text{IWC}_T$  ( $\text{kg m}^{-3}$ ).

69

### 70 A.3 Velocities of falling cloud ice

71 The procedure in the following derivation is similar to Zurovac-Jevtic and Zhang (2003).  
 72 Although they derived one velocity, two separate velocities that correspond to small and large  
 73 particles are derived here.

74

#### 75 A.3.1 Fall velocity for ice particles smaller than 100 $\mu\text{m}$

76 Bulk fall velocity for cloud ice particles smaller than 0.01cm,  $v_i$ , was derived as follows by  
 77 integration using Eq. (S4) and Eq. (S5).

$$\begin{aligned}
 78 \quad v_i &= \int_0^{0.01\text{cm}} V_t(D_m) N(D_m) \rho_{\text{ice}} \frac{\pi}{6} D_m^3 dD_m / \text{IWC}_{<100} \\
 79 \quad &= \frac{\text{IWC}_{\text{all}}}{\Gamma(5)} \chi \left( \frac{\pi \rho_{\text{ice}}}{6 \alpha \alpha_{<100}^3} \right)^{\frac{y}{\beta}} \int_0^{0.01 \alpha_{<100}} t^{4 + \frac{3y}{\beta}} \exp(-t) dt / \text{IWC}_{<100} \quad (\text{S11})
 \end{aligned}$$

80 On the other hand, the relation between  $\text{IWC}_{<100}$  and  $\text{IWC}_{\text{all}}$  is as follows ( $t \equiv \alpha_{<100} D_m$ ), using Eq.  
 81 (S5):

$$\begin{aligned}
 82 \quad \text{IWC}_{<100} &= \int_0^{0.01\text{cm}} N(D_m) \rho_{\text{ice}} \frac{\pi}{6} D_m^3 dD_m \\
 83 \quad &= \frac{\text{IWC}_{\text{all}}}{\Gamma(5)} \int_0^{0.01 \alpha_{<100}} t^4 \exp(-t) dt \quad (\text{S12})
 \end{aligned}$$

84 This relationship should be used because the number distribution function for  $D_m < 0.01$  (cm)  
 85 still has a non-negligible value in the region where  $D_m$  is larger than 0.01 cm. Using Eq. (S11)  
 86 and Eq. (S12),  $v_i$  can be written as follows:

$$87 \quad v_i = \chi \left( \frac{\pi \rho_{\text{ice}}}{6 \alpha \alpha_{<100}^3} \right)^{\frac{y}{\beta}} \frac{\int_0^{0.01 \alpha_{<100}} t^{4 + \frac{3y}{\beta}} \exp(-t) dt}{\int_0^{0.01 \alpha_{<100}} t^4 \exp(-t) dt} \quad (\text{S13})$$

88 Because  $\alpha_{<100}$  given by Eq. (S6) is a function of  $\text{IWC}_{<100}$ , the ratio of the two integrations in  
 89 Eq. (S13) can be derived as a function of  $\text{IWC}_{<100}$  numerically. It was fitted by  $\text{IWC}_{<100}$  as  
 90 follows:

$$91 \quad \frac{\int_0^{0.01\alpha_{<100}} t^{4+\frac{3y}{\beta}} \exp(-t) dt}{\int_0^{0.01\alpha_{<100}} t^4 \exp(-t) dt} = 17.86 \exp(-1.211 \times 10^4 \text{IWC}_{<100} + 3.64 \times 10^7 \text{IWC}_{<100}^2)$$

92 Then Eq. (S13) results in the following:

$$93 \quad v_i = 17.86x \left( \frac{\pi \rho_{\text{ice}}}{6\alpha_{<100}} \right)^{\frac{y}{\beta}} \exp(-1.211 \times 10^4 \text{IWC}_{<100} + 3.64 \times 10^7 \text{IWC}_{<100}^2)$$

94 The final form was derived by fitting the above equation by  $\text{IWC}_{<100}$  again (note that the unit of  
95  $v_i$  is  $\text{m s}^{-1}$ ) in this final form).

$$96 \quad v_i = 1.56 \text{IWC}_{<100}^{0.24}$$

97

### 98 **A.3.2 Fall velocity for ice particles larger than 100 $\mu\text{m}$**

99 Bulk fall velocity for cloud ice particles larger than 0.01 cm,  $v_s$ , was derived as follows by  
100 integration using Eq. (S4) and Eq. (S7). The function was integrated over the whole size range  
101 because the number distribution function has a value small enough in the range smaller than  
102 0.01 cm and the contribution of that part to the derived velocity is insignificant. In this case, the  
103 integration simplifies as:

$$104 \quad v_s = \int_{0.01\text{cm}}^{\infty} V_t(D_m) N(D_m) \rho_{\text{ice}} \frac{\pi}{6} D_m^3 dD_m / \text{IWC}_{\text{all}}$$

$$105 \quad \approx \int_0^{\infty} V_t(D_m) N(D_m) \rho_{\text{ice}} \frac{\pi}{6} D_m^3 dD_m / \text{IWC}_{\text{all}}$$

$$106 \quad = x \left( \frac{\pi \rho_{\text{ice}}}{6\alpha} \right)^{\frac{y}{\beta}} \left( D_0 e^{(\mu_{>100} + \frac{3}{2}(2+\frac{y}{\beta})\sigma_{>100}^2)} \right)^{\frac{y}{\beta}}$$

107 The equation above can be modified as follows by substituting Eq. (S8) and Eq. (S9), and  
108 then by fitting using  $\text{IWC}_{>100}$  (note that the unit of  $v_s$  is  $\text{m s}^{-1}$ ) in this final form):

$$109 \quad v_s = 2.23 \text{IWC}_{>100}^{0.074}$$
